# Supplementary material for: Prevalence of stroke in China, 2013–2019: A population-based study
Source: PubMed Central journal article supplement — Lancet Reg Health West Pac. 2022 Jul 30;28:100550. doi: 10.1016/j.lanwpc.2022.100550 (PMC9727498; doi:10.1016/j.lanwpc.2022.100550), 2022-07-30
Supplement: mmc1.pdf [file mmc1.pdf]

## **Prevalence of Stroke in China, 2013–2019: a population-based study**

### **Supplementary materials**

Supplemental Methods

Supplemental Chinese version of the abstract

Tables S1-S5

## Supplementary methods

### High-risk population screening and intervention program proposals

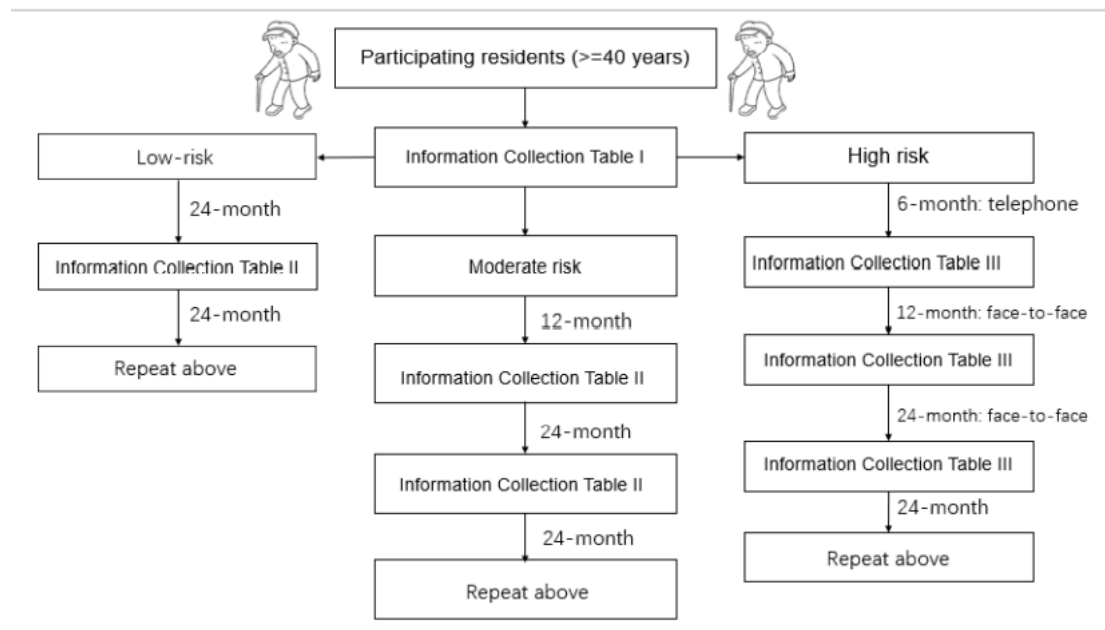

Screened people were divided into three groups (high risk, caution and low risk) according to the National Stroke Association's Stroke Risk Scorecard (<https://www.neurologystroke.com/pdfs/Stroke-Risk-Assessment-Scorecard.pdf>), which including hypertension, hyperlipidemia, diabetes, obesity, smoking, atrial fibrillation, lack of exercise, and family history of stroke. Participants had greater than or equal to three above factors or transient ischemic attack or history of stroke are defined as high risk, while had one of the following medical histories: hypertension, diabetes, and atrial fibrillation are defined as moderate risk.

### **Definition criteria of risk factors**

Smoking status was divided into three categories: current smoking (was defined as continuous or cumulative smoking for >6 months), former smoking (was defined as continuous smoking for >6 months but no smoking at the time of the survey), and passive smoking (was defined as exposure to smoke from smokers for at least 15 minutes per day and >1 day per week among non-smokers).

Alcohol consumption was divided into three categories: heavy alcohol consumption (was defined as the intake of alcoholic beverages  $\geq 3$  times per week and  $\geq 100$  mL per drinking episode), light to moderate alcohol consumption (was defined as the intake of alcoholic beverages <3 times per week or <100 mL per drinking episode), and none.

Vegetable and fruit consumption were classified according to the following frequency tertiles (days per week):  $\leq 2$ , 3 to 4, and  $\geq 5$ .

Physical inactivity was defined according to WHO recommendations standard (at least 150 min of moderate-intensity, or 75 min of vigorous-intensity physical activity per week, or any equivalent combination of the two) [1].

Body mass index (BMI) was calculated as body weight (kg) divided by the square of height (m). Overweight (BMI of 24.0–27.9 kg/m<sup>2</sup>) and obesity (BMI  $\geq 28$  kg/m<sup>2</sup>) were defined according to the guidelines established for Chinese adults [2].

Hypertension was defined as systolic blood pressure  $\geq 140$  mm Hg, diastolic blood pressure  $\geq 90$  mm Hg, self-reported hypertension, or the use of antihypertension medications. Blood pressure measurement needs to be measured at least 3 times on a different day. The standard for diagnosing hypertension by ambulatory blood pressure is the 24-hour average blood pressure  $\geq 130/80$  mmHg, average blood pressure during the day  $\geq 135/85$  mmHg, or average blood pressure at night pressure  $\geq 120/70$  mmHg.

Diabetes mellitus was defined as fasting plasma glucose level  $\geq 7.0$  mmol/L or oral glucose tolerance test  $\geq 11.1$  mmol/L, self-reported diabetes mellitus (was determined previously by a healthcare professional), the use of oral hypoglycemic agents, or insulin injections.

Dyslipidemia was defined on the basis of  $\geq 1$  of the following criteria: triglycerides  $\geq 2.26$  mmol/L, total cholesterol  $\geq 6.22$  mmol/L, high-density lipoprotein cholesterol <1.04

mmol/L, low-density lipoprotein cholesterol  $\geq 4.14$  mmol/L, self-reported dyslipidemia, or the use of anti-dyslipidemia medications [3].

AF was defined as self-reported history of persistent AF or ECG results. AF was divided into three categories: paroxysmal AF (atrial fibrillation occurs for less than 7 days, often less than 24 days, and can be converted on its own sinus rhythm), persistent AF (atrial fibrillation occurs more than 7 days, more electroconversion or drug conversion is required), and permanent AF (cannot be converted to sinus heart rhythm).

Family history of stroke was defined as the occurrence of stroke in  $\geq 1$  of the participant's parents or siblings.

The following information in stroke patients needs to be collected: the time of first and last onset, the main symptoms at the time of onset, the treatment method (inpatient [the name and level of the medical institution], emergency, outpatient, family ward); the main classification (cerebral infarction, cerebral hemorrhage, subarachnoid hemorrhage), imaging examination, intracranial and extracranial vessels assess, the severity of symptoms, clinical treatment (internal medicine, intervention, surgery), rehabilitation treatment in hospital; rehabilitation after discharge (such as rehabilitation refers to community rehabilitation or homework under the guidance of regular rehabilitation physicians treatment and physical therapy), outcome and whether regular secondary prevention etc.

## **Sample weights**

Across all National Stroke High-Risk Population Screening program, we developed sample weights to account for multi-stage sampling design and post-stratification. For an individual in the sample, his/her sample weights were developed as follows.

### **1. Base weights for multi-stage design ( $W_{design}$ )**

1.1 Stratifications: East/ Central /West \* Urban/Rural = 6 stratum

1.2  $A_1$ =Number of districts/counties in different stratum in the sample

1.3  $B_1$ =Number of districts/counties -level administrative districts in each stratum

1.4  $W_{design}=B_1/A_1$ , assign the weight  $W_{design}$  of each stratum to the corresponding case of each stratum

### **2. Non-response weights ( $W_{nr}$ ) from 2013 to 2019**

$W_{nr}$  = the number of eligible adults in the household where the individual was from divided by the number of participating adults in the household

### **3. Post-stratification weights ( $W_{ps}$ )**

3.1 Stratifications: gender (2 levels) \* geographic region (6 levels: North China, Northeast China, East China, Central South, Southwest, Northwest) \*age group (9 levels: 40-44, 45-49, 50-54, 55-59, 60-64, 65-69, 70-74, 75-79, 80+) =108 stratum

3.2  $A_2$ =The sum of the case weights  $W_{design}$  of each stratum of the sample

3.3  $B_2$ =Number of people by stratum in the 2010 Sixth census

3.4  $W_{ps}=B_2/A_2$ , assign the weight  $W_{ps}$  of each stratum to the corresponding case of each stratum

## Supplemental Chinese version of the abstract

中国 2013 年到 2019 年卒中患病率：一项基于中国卒中高危人群筛查项目的研究

涂文军, 巢宝华, 华杨, 闫峰, 卞何涛, 杨弋, 楼敏, 康德智, 何俐, 楚兰, 曾进胜, 武剑, 陈会生, 韩建峰, 马林, 曹雷和王陇德

**研究背景:** 中国的卒中负担在过去 40 年持续增加。本研究通过中国卒中高危人群筛查项目旨在确定 2013 年至 2019 年中国卒中患病率趋势以及按社会人口学特征（包括性别、年龄、居住地、种族和省份）分层的患病率趋势。

**方法:** 我们利用了卒中高危人群筛查和干预计划中 2013 年 1 月至 2019 年 12 月期间生成的数据, 这是一个正在持续进行的基于人群的筛查项目, 每年在中国大陆 31 个省招募约 80 万名 40 岁以上的社区居民。本项目采用现场调查的方式收集信息。所有在入组时具有卒中病史的活着的受试者都被认为患有卒中。根据年龄和性别估计卒中的患病率。粗略和年龄标准化的流行率与其 95% 置信区间(CI) 同时计算。

**结果:** 研究期间最终纳入来自 31 个省 227 个城市的 4229616 名 40 岁以上的中国成年人。入组率从 47.8% (2013 年) 到 65.4% (2019 年) 不等。从 2013 到 2019 年卒中加权患病率逐年增加, 2013 年为 2.28% (95% CI: 2.28%-2.28%), 2014 年为 2.34%

(2.34%-2.35%), 2015 年为 2.43%(2.43%-2.43%), 2016 年为 2.48% (2.48%-2.48%),

2017 年 2.52%(2.52%-2.52%), 2018 年为 2.55% (2.55%-2.55%), 2019 年为 2.58%

(2.58%-2.58%) (趋势 p 20%)。卒中患病率受到年龄、性别、城乡、民族和省份的影响。男

性、老年人、满族和蒙古族以及居住在农村和东北地区的居民卒中患病率较高。

**研究结论:** 在过去的 7 年 (2013-2019 年) 中, 中国和大多数省份的卒中患病率持续上升, 需要在全国范围内制定广泛的战略以改善预防, 加大筛查力度并提供更广泛有效且负担得起的干预措施。特别是对于脑卒中高发的省份, 例如黑龙江, 内蒙古和河南, 现有数据将有助于省卫生健康委制定有针对性的脑卒中预防规划和医疗资源配置。

The national major public health service project -- the screening and intervention project for the high-risk population of stroke

# Survey of risk factors of Cardiovascular and Cerebrovascular Disease Risk Factors 2019

(For community, township, high-risk stroke population at 6 months, 12 months of follow-up and 12 months of middle-risk population follow-up)

Informed consent: I have read the informed consent and volunteered to participate in this screening and intervention project. I agree to use the data for the management of the national health administration

Signature: \_\_\_\_\_

|                                         |                                                        |
|-----------------------------------------|--------------------------------------------------------|
| Name of screening institution : _____   | Screening date : day : _____ month: _____ year : _____ |
| On-site QC: _____ Contact number: _____ |                                                        |

## I. BASIC INFORMATION

| 1.1 Demographic information                                                                                                                                                                                                                                                                                                                                                                                                                                                                                                                                                                    |                                                                                                                                                                                       |                                                                                       |                                  |
|------------------------------------------------------------------------------------------------------------------------------------------------------------------------------------------------------------------------------------------------------------------------------------------------------------------------------------------------------------------------------------------------------------------------------------------------------------------------------------------------------------------------------------------------------------------------------------------------|---------------------------------------------------------------------------------------------------------------------------------------------------------------------------------------|---------------------------------------------------------------------------------------|----------------------------------|
| Name : _____                                                                                                                                                                                                                                                                                                                                                                                                                                                                                                                                                                                   | Sex: <input type="radio"/> male <input type="radio"/> female                                                                                                                          | Ethnicity : _____                                                                     | ID number: _____                 |
| Marital status: <input type="radio"/> unmarried <input type="radio"/> married <input type="radio"/> widowed <input type="radio"/> divorced <input type="radio"/> others                                                                                                                                                                                                                                                                                                                                                                                                                        |                                                                                                                                                                                       |                                                                                       |                                  |
| Living conditions : <input type="radio"/> living alone <input type="radio"/> living with spouse <input type="radio"/> living with children <input type="radio"/> living with spouse and children<br><input type="radio"/> living with others (other relatives or care givers) <input type="radio"/> nursing home <input type="radio"/> others                                                                                                                                                                                                                                                  |                                                                                                                                                                                       |                                                                                       |                                  |
| Education level : <input type="radio"/> primary school and below <input type="radio"/> junior high <input type="radio"/> technical school/high school <input type="radio"/> junior college /Bachelor's degree <input type="radio"/> master's degree or above                                                                                                                                                                                                                                                                                                                                   |                                                                                                                                                                                       |                                                                                       |                                  |
| Retired : <input type="radio"/> Yes <input type="radio"/> No                                                                                                                                                                                                                                                                                                                                                                                                                                                                                                                                   |                                                                                                                                                                                       |                                                                                       |                                  |
| Occupation (pre-retirement occupation) : <input type="radio"/> Person in charge of state organs, party-mass organizations, enterprises and institutions <input type="radio"/> Professional and technical personnel <input type="radio"/> Clerical and related personnel <input type="radio"/> Business and service personnel <input type="radio"/> Producers in agriculture, forestry, animal husbandry, fishing and water conservation <input type="radio"/> Production, transportation equipment operators and related personnel <input type="radio"/> Soldiers <input type="radio"/> Others |                                                                                                                                                                                       |                                                                                       |                                  |
| Average annual income : <input type="radio"/> Under 5K <input type="radio"/> 5K-10K <input type="radio"/> 10K-20K <input type="radio"/> Above 20K                                                                                                                                                                                                                                                                                                                                                                                                                                              |                                                                                                                                                                                       |                                                                                       |                                  |
| Main medical payment methods : <input type="radio"/> Basic medical insurance for urban workers <input type="radio"/> New basic medical insurance for urban residents <input type="radio"/> The new rural cooperative medical insurance <input type="radio"/> Commercial health insurance <input type="radio"/> All public <input type="radio"/> Self-paying <input type="radio"/> Other Social Insurance <input type="radio"/> poverty relief <input type="radio"/> others                                                                                                                     |                                                                                                                                                                                       |                                                                                       |                                  |
| 1.2 Communication and contact information                                                                                                                                                                                                                                                                                                                                                                                                                                                                                                                                                      |                                                                                                                                                                                       |                                                                                       |                                  |
| Address: _____                                                                                                                                                                                                                                                                                                                                                                                                                                                                                                                                                                                 | province: _____ city: _____                                                                                                                                                           | District /county: _____ Streets /towns: _____ Residential (village) committees: _____ | Zip Code (optional): _____       |
| Current address : _____                                                                                                                                                                                                                                                                                                                                                                                                                                                                                                                                                                        | province: _____ city: _____                                                                                                                                                           | District /county: _____ Streets /towns: _____ Residential (village) committees: _____ | Zip Code (optional): _____       |
| Mobile phone: _____                                                                                                                                                                                                                                                                                                                                                                                                                                                                                                                                                                            | Telephone : _____                                                                                                                                                                     | Wechat (optional) : _____                                                             | Email address (optional) : _____ |
| Person to contact: _____                                                                                                                                                                                                                                                                                                                                                                                                                                                                                                                                                                       | Relationship : <input type="radio"/> parent <input type="radio"/> couple <input type="radio"/> children <input type="radio"/> Brothers & Sisters <input type="radio"/> others : _____ |                                                                                       | Contact phone: _____             |
| 1.3 Status of this survey                                                                                                                                                                                                                                                                                                                                                                                                                                                                                                                                                                      |                                                                                                                                                                                       |                                                                                       |                                  |
| Investigation: <input type="radio"/> face to face <input type="radio"/> telephone                                                                                                                                                                                                                                                                                                                                                                                                                                                                                                              |                                                                                                                                                                                       |                                                                                       |                                  |
| Was the survey conducted by the respondents themselves: <input type="radio"/> yes                                                                                                                                                                                                                                                                                                                                                                                                                                                                                                              |                                                                                                                                                                                       |                                                                                       |                                  |
| <input type="radio"/> no, Relationship between the informer and the respondent: <input type="radio"/> parent <input type="radio"/> spouse <input type="radio"/> child <input type="radio"/> brother and sister <input type="radio"/> others : _____                                                                                                                                                                                                                                                                                                                                            |                                                                                                                                                                                       |                                                                                       |                                  |
| Whether lost to follow-up : <input type="radio"/> no                                                                                                                                                                                                                                                                                                                                                                                                                                                                                                                                           |                                                                                                                                                                                       |                                                                                       |                                  |
| <input type="radio"/> yes, reason: <input type="radio"/> lost contact <input type="radio"/> refused to participate in the investigation <input type="radio"/> other: _____                                                                                                                                                                                                                                                                                                                                                                                                                     |                                                                                                                                                                                       |                                                                                       |                                  |
| Dead or not: <input type="radio"/> no                                                                                                                                                                                                                                                                                                                                                                                                                                                                                                                                                          |                                                                                                                                                                                       |                                                                                       |                                  |
| <input type="radio"/> yes, Time of death: before 31 December 2018                                                                                                                                                                                                                                                                                                                                                                                                                                                                                                                              |                                                                                                                                                                                       |                                                                                       |                                  |
| <input type="radio"/> Between 1 January 2019 and 31 December 2019                                                                                                                                                                                                                                                                                                                                                                                                                                                                                                                              |                                                                                                                                                                                       |                                                                                       |                                  |
| <input type="radio"/> After January 1st, 2020: month: _____ day: _____                                                                                                                                                                                                                                                                                                                                                                                                                                                                                                                         |                                                                                                                                                                                       |                                                                                       |                                  |
| The cause of death: (Register for 2019 only)                                                                                                                                                                                                                                                                                                                                                                                                                                                                                                                                                   |                                                                                                                                                                                       |                                                                                       |                                  |
| <input type="radio"/> stroke ( <input type="radio"/> Hemorrhagic stroke <input type="radio"/> Ischemic stroke <input type="radio"/> Unknown )                                                                                                                                                                                                                                                                                                                                                                                                                                                  |                                                                                                                                                                                       |                                                                                       |                                  |
| <input type="radio"/> Coronary heart disease (CHD) <input type="radio"/> malignant tumor <input type="radio"/> Respiratory disease <input type="radio"/> Liver and kidney disease - non - tumor <input type="radio"/> Accident                                                                                                                                                                                                                                                                                                                                                                 |                                                                                                                                                                                       |                                                                                       |                                  |

Of those who died of stroke, Death location :  In the hospital  Outside the hospital

Whether in the hospital : \_\_\_\_\_ hospital level :  Provincial hospital  Prefecture-level hospital  County-level

Yes, hospital: \_\_\_\_\_ hospitals  District or township health institutions

Main Diagnosis at Admission :  Cerebral infarction  hemorrhage  SAH  TIA

no

Medical record material :  provide  not provided

\*In 2019, death registration, medical records and other supporting materials should be provided at least 85%

Screening officer: \_\_\_\_\_

## 2. Lifestyle

Screening officer : \_\_\_\_\_

### 2.1 Smoking

No

Yes, If you are , smoke for \_\_\_\_\_ years \_\_\_\_\_ cigarettes a day

If you have quit smoking, how long you have quit smoking: \_\_\_\_\_ years

### 2.2 Drinking

no drinking

A small amount of alcohol

Frequent heavy drinking (liquor  $\geq 3$  times/week,  $\geq 100$ ml each time)

### 2.3 Sports habits

Regular exercise (moderate intensity exercise equivalent to brisk walking, and  $\geq 3$  times per week, each time  $\geq 30$  minutes, including moderate and heavy manual labor)  Lack of physical activity (those who do not meet the above criteria for regular exercise)

### 2.4 Dietary habits

Taste:  salty  weak salt taste  moderate

Mix meat quality:  meat  vegetarian  equilibrium

**Vegetables** (eat 300g vegetables a day):   $\geq 5$  d /w  3-4 d /w   $\leq 2$  d /w

**Fruit** (200g per day):   $\geq 5$  d /w  3-4 d /w   $\leq 2$  d /w

## 3. Family history

Screening officer : \_\_\_\_\_

### 3.1 Stroke

None

Yes, Relationship:  farther  mother  brothers and sisters :(How many people are sick? \_\_\_\_\_)

Unknown

### 3.2 Coronary heart disease

None

Yes, Relationship:  farther  mother  brothers and sisters :(How many people are sick? \_\_\_\_\_)

Unknown

### 3.3 Hypertension

None

Yes, Relationship:  farther  mother  brothers and sisters :(How many people are sick? \_\_\_\_\_)

Unknown



### 3.4 Diabetes

- None  
 Yes , Relationship : farther mother brothers and sisiters : (How many people are sick?\_\_\_\_)  
 Unknown

### 4.\*Main medical history and control during this survey

(The survey period refers to the period from 2018 survey to this survey, the same below)

Screening officer : \_\_\_\_\_

#### 4.1 History of cerebrovascular disease

Cerebrovascular history at the time of last screening/intervention:  no

Yes , Type of cerebrovascular disease : infarction hemorrhage SAH TIA

Time of first symptoms:\_\_\_\_\_

During this investigation, there is no new incident of cerebrovascular disease:  No

yes , How many episodes : \_\_\_\_\_

Time of first symptoms:\_\_\_\_\_

Hospital Level :  Provincial hospital  Prefecture-level hospital  County-level hospitals  Community or township health hospitals

Main diagnosis :  infarction  hemorrhage  SAH  TIA

Whether to receive rehabilitation treatment during hospitalization :  no  yes

Whether to receive rehabilitation treatment after hospitalization :  no  yes

Medical record material :  provide  not provided

Time of last symptoms:\_\_\_\_\_

Hospital Level :  Provincial hospital  Prefecture-level hospital  County-level hospitals  Community or township health hospitals

Main diagnosis :  infarction  hemorrhage  SAH  TIA

Whether to receive rehabilitation treatment during hospitalization :  no  yes

Whether to receive rehabilitation treatment after hospitalization :  no  yes

Medical record material :  provide  not provided

(Note: The interval between two outbreaks should be more than 28 days. If there are three or more outbreaks, please record them separately.)

\* For cerebrovascular diseases diagnosed in 2019, the most recent diagnosis and hospitalization records should be provided at least 85% of the time

#### MRS score: ( Cerebrovascular disease patients )

Evaluation of time : day\_\_\_\_month \_\_\_\_year\_\_\_\_\_ The evaluator : \_\_\_\_\_

| Options (single option)                                                                                                                             | score |
|-----------------------------------------------------------------------------------------------------------------------------------------------------|-------|
| <input type="radio"/> No symptoms at all                                                                                                            | 0     |
| <input type="radio"/> Despite symptoms, she has no significant dysfunction and is able to complete all routine tasks and daily life                 | 1     |
| <input type="radio"/> Slightly disabled, unable to complete all pre-illness activities, but able to take care of daily life without assistance      | 2     |
| <input type="radio"/> Moderately disabled, with partial assistance, but able to walk independently                                                  | 3     |
| <input type="radio"/> Severe disability, unable to walk independently, unable to meet their daily needs without other people's help                 | 4     |
| <input type="radio"/> Severe disability, persistent bedridden, incontinence, continuous care and attention, and complete dependence on other people | 5     |

#### 4.2 History of the heart

History of heart disease at last screening/intervention:  no

yes Type of heart disease: 0 coronary heart disease 0 atrial fibrillation 0 valvular heart disease 0 other 0 unknown

Was there a new heart attack during the survey?  无

Type of heart disease: coronary heart disease coronary heart disease( angina, myocardial infarction, asymptomatic coronary stenosis)

Time of first diagnosis(date) : \_\_\_\_\_

atrial fibrillation ( Paroxysmal , Persistent  Unknown)

Valvular heart disease

other ( \_\_\_\_\_ )

unknown

**Hospital Level** :  Provincial hospital  Prefecture-level hospital  County-level hospitals  Community or township health hospitals

If you have atrial fibrillation (including previous and newly discovered patients with atrial fibrillation during this survey) :

Whether or not to take antithrombotic drugs :  no  yes

Drug varieties : warfarin New anticoagulant aspirin clopidogrel others

**Duration of use ( date )** : \_\_\_\_\_ Antithrombotic drugs :  regular  irregular

### 4.3 Hypertension

Hypertension at last screening/intervention:  no  yes

Time of first diagnosis of hypertension ( time ) : \_\_\_\_\_

Frequency of blood pressure measurement during this survey: Never measured  Often measured (at least once a week)  Occasionally measured

**Whether home self - blood pressure test?**

no  occasionally measurement  often measured : \_\_\_\_\_ measurement frequency : \_\_\_\_\_

Have you ever been diagnosed with hypertension  no  yes, confirmed time (date): \_\_\_\_\_

Are you taking blood pressure medication  no  yes

Type of drug use :  diuretics  calcium antagonist  -blocker  -blocker  ,  -blockers,  ACEI  ARB  others

Duration of use(date): \_\_\_\_\_ , Drug use :  Regularity  Irregularity

Blood pressure control:  Standard  Not clear

### 4.4 Abnormal blood lipid

History of dyslipidemia at the time of last screening/intervention :  none  yes

First diagnosis time of dyslipidemia ( date ) : \_\_\_\_\_

**Frequency of blood lipid measurement:**  Never tested.  Regular tests.  occasionally tested (less than 1 times a date )

Is there any new dyslipidemia found during this investigation:  no

yes , Confirmed date : \_\_\_\_\_

Types of dyslipidemia: high cholesterol high triglyceride high LDL-C low HDL-C unknown

**If there are patients with dyslipidemia** (including patients with previous dyslipidemia and patients with new dyslipidemia found during this survey),

Whether to take lipid-regulating drugs :  no;

yes : Statins Beta Others

### 4.5 diabetes

History of diabetes at the time of last screening/intervention:  no  yes

First diagnosis time of diabetes(date): \_\_\_\_\_

Frequency of blood glucose measurement during the survey period :  Never tested.  Regular tests.  occasionally tested (less than 1 times a year)

Is there any newly found diabetes during this investigation? No Yes, the date of diagnosis: \_\_\_\_\_

If patients with diabetes (including previous and newly discovered diabetes patients during this survey)

Whether to use hypoglycemic agents :  no

yes Take hypoglycemic drugs insulin others

Blood glucose control:  basically standard,  not standard,  unclear

### 5. Physical examination

#### 5.1 General signs screening officer: \_\_\_\_\_

Inspection time: month: \_\_\_\_\_; day: \_\_\_\_\_ year \_\_\_\_\_

Height: \_\_\_\_\_ cm Weight: \_\_\_\_\_ kg BMI (automatically generated by the system) : \_\_\_\_\_ (kg/m<sup>2</sup>) Waist circumference: \_\_\_\_\_

#### 5.2 Blood pressure is now measured (on the same side, two times) screening officer : \_\_\_\_\_

Time of measurement: month : \_\_\_\_\_ day: \_\_\_\_\_ year: \_\_\_\_\_

First, systolic blood pressure SBP: \_\_\_\_\_ mmhg Diastolic pressure DBP: \_\_\_\_\_ mmhg pulse: \_\_\_\_\_ times/min

secondly, systolic blood pressure SBP: \_\_\_\_\_ mmhg Diastolic pressure DBP: \_\_\_\_\_ mmhg pulse: \_\_\_\_\_ times/min

#### 5.3 Cardiac auscultation screening officer: \_\_\_\_\_

Inspection time: month: \_\_\_\_\_; day: \_\_\_\_\_ year \_\_\_\_\_

Heart murmur:  none  Have a heart rhythm:  in order  out of order

### 6、Electrocardiogram (Cardiac auscultation patients with arrhythmia must do the project)

Inspection time: month: \_\_\_\_\_; day: \_\_\_\_\_ year \_\_\_\_\_ screening officer: \_\_\_\_\_

inspection:  normal

abnormal; abnormal type:  atrial fibrillation  others

### 7、Laboratory examination

#### 7.1 Blood glucose

Inspection time: month: \_\_\_\_\_; day: \_\_\_\_\_ year \_\_\_\_\_ Fasting blood glucose: \_\_\_\_\_ mmol/L

Inspection time: month: \_\_\_\_\_; day: \_\_\_\_\_ year \_\_\_\_\_ Blood glucose 2 hours postprandial (recommended) : \_\_\_\_\_ mmol/L

Inspection time: month: \_\_\_\_\_; day: \_\_\_\_\_ year \_\_\_\_\_ Hemoglobin: \_\_\_\_\_ %

#### 7.2 Blood lipids

Inspection time: month: \_\_\_\_\_; day: \_\_\_\_\_ year \_\_\_\_\_

Triglyceride: \_\_\_\_\_ mmol/L, Cholesterol: \_\_\_\_\_ mmol/L

Low density lipoprotein cholesterol: \_\_\_\_\_ mmol/L High density lipoprotein cholesterol : \_\_\_\_\_ mmol/L

#### 7.3 Homocysteine

Inspection time: month: \_\_\_\_\_; day: \_\_\_\_\_ year \_\_\_\_\_ Homocysteine: \_\_\_\_\_ μmol/L

### 8. Risk rating for cardiovascular and cerebrovascular diseases

|   |                                                                         |
|---|-------------------------------------------------------------------------|
| 1 | High blood pressure: <input type="radio"/> yes <input type="radio"/> no |
| 2 | dyslipidemia: <input type="radio"/> yes <input type="radio"/> no        |

|                                  |                                                                                                   |                              |                            |                                      |                                |                                |
|----------------------------------|---------------------------------------------------------------------------------------------------|------------------------------|----------------------------|--------------------------------------|--------------------------------|--------------------------------|
| 3                                | <b>Diabetes:</b> <input type="radio"/> yes <input type="radio"/> no                               |                              |                            |                                      |                                |                                |
| 4                                | Atrial fibrillation or valvular heart disease: <input type="radio"/> yes <input type="radio"/> no |                              |                            |                                      |                                |                                |
| 5                                | History of smoking: <input type="radio"/> yes <input type="radio"/> no                            |                              |                            |                                      |                                |                                |
| 6                                | <b>Obvious overweight or obesity:</b> <input type="radio"/> yes <input type="radio"/> no          |                              |                            |                                      |                                |                                |
| 7                                | Lack of movement : <input type="radio"/> yes <input type="radio"/> no                             |                              |                            |                                      |                                |                                |
| 8                                | Family history of stroke: <input type="radio"/> yes <input type="radio"/> no                      |                              |                            |                                      |                                |                                |
| <b>I</b>                         | Past stroke: <input type="radio"/> yes <input type="radio"/> no                                   |                              |                            |                                      |                                |                                |
| <b>II</b>                        | Previous transient ischemic attack (TIA) : <input type="radio"/> yes <input type="radio"/> no     |                              |                            |                                      |                                |                                |
| <b>Risk classification</b>       |                                                                                                   | <input type="radio"/> stroke | <input type="radio"/> OTIA | <input type="radio"/> On≥3 high risk | <input type="radio"/> critical | <input type="radio"/> low risk |
| <b>Hazard marking</b>            |                                                                                                   |                              |                            |                                      |                                |                                |
| <b>Management classification</b> |                                                                                                   | Enhanced management          |                            |                                      | Standardized management        | Health management              |

### 9.\*Cervical vascular ultrasound

\*Note:Required projects for high-risk groups

| <b>Inspection time:</b> month:____;day:____ year:____                                            |                                                                           | Screening officer: ____                                                                       |                          | Name of Inspection : _____ |                          |                          |                          |                          |                          |                          |    |
|--------------------------------------------------------------------------------------------------|---------------------------------------------------------------------------|-----------------------------------------------------------------------------------------------|--------------------------|----------------------------|--------------------------|--------------------------|--------------------------|--------------------------|--------------------------|--------------------------|----|
| Inspection results : <input type="radio"/> All normal <input type="radio"/> Abnormal in any part |                                                                           |                                                                                               |                          |                            |                          |                          |                          |                          |                          |                          |    |
| Abnormal                                                                                         | Abnormal project                                                          | Location of the offending lesion (Note: fill in the corresponding number " " in this section) |                          |                            |                          |                          |                          |                          |                          |                          |    |
|                                                                                                  |                                                                           | Left                                                                                          |                          |                            |                          |                          | Right                    |                          |                          |                          |    |
|                                                                                                  |                                                                           | CCA                                                                                           | Carotid sinus            | IC                         | subclavian Arterial SA   | VA                       | CCA                      | subclavian Arterial SA   | IC                       | subclavian Arterial SA   | VA |
| Intima-Media Thickness IMT                                                                       | Thickening (IMT 1.0 mm) ( 0=no,1=yes)                                     | <input type="checkbox"/>                                                                      | /                        | /                          | /                        | /                        | <input type="checkbox"/> | /                        | /                        | /                        |    |
|                                                                                                  | Thickness: ____ mm                                                        |                                                                                               |                          |                            |                          |                          |                          |                          |                          |                          |    |
| Plaque                                                                                           | <b>Number</b>                                                             | <input type="radio"/> no <input type="radio"/> single <input type="radio"/> multiple          |                          |                            |                          |                          |                          |                          |                          |                          |    |
|                                                                                                  | Morphology (1= irregular, 0= regular)                                     | <input type="checkbox"/>                                                                      | <input type="checkbox"/> | <input type="checkbox"/>   | <input type="checkbox"/> | <input type="checkbox"/> | <input type="checkbox"/> | <input type="checkbox"/> | <input type="checkbox"/> | <input type="checkbox"/> |    |
|                                                                                                  | Ulcer (1= Yes,0= No)                                                      | <input type="checkbox"/>                                                                      | <input type="checkbox"/> | <input type="checkbox"/>   | <input type="checkbox"/> | <input type="checkbox"/> | <input type="checkbox"/> | <input type="checkbox"/> | <input type="checkbox"/> | <input type="checkbox"/> |    |
|                                                                                                  | Echo (1= strong echo,2= medium echo, 3= low echo,4= mixed echo)           | <input type="checkbox"/>                                                                      | <input type="checkbox"/> | <input type="checkbox"/>   | <input type="checkbox"/> | <input type="checkbox"/> | <input type="checkbox"/> | <input type="checkbox"/> | <input type="checkbox"/> | <input type="checkbox"/> |    |
| Narrow or block                                                                                  | Stenosis rate (0= no stenosis, 1=1-49%, 2=50-69%, 3=70-99%, 4= occlusion) | <input type="checkbox"/>                                                                      | <input type="checkbox"/> | <input type="checkbox"/>   | <input type="checkbox"/> | <input type="checkbox"/> | <input type="checkbox"/> | <input type="checkbox"/> | <input type="checkbox"/> | <input type="checkbox"/> |    |

### 10. Surgical or interventional treatment of vascular lesions

Screening officer:\_\_\_\_\_

| 10.1 The carotid artery                                                                                                                                                 |                                                                                                                                                                                                                                                                                                        |
|-------------------------------------------------------------------------------------------------------------------------------------------------------------------------|--------------------------------------------------------------------------------------------------------------------------------------------------------------------------------------------------------------------------------------------------------------------------------------------------------|
| <b>Carotid artery stenting (CAS)</b>                                                                                                                                    | <input type="radio"/> no <input type="radio"/> yes <input type="radio"/> left <input type="radio"/> right <input type="radio"/> bilateral                                                                                                                                                              |
|                                                                                                                                                                         | Operation time(date):____ Name of institution performing CAS:_____                                                                                                                                                                                                                                     |
|                                                                                                                                                                         | Postoperative review: <input type="radio"/> no <input type="radio"/> yes, Time of review: <input type="checkbox"/> 3 months after surgery, <input type="checkbox"/> 6 months after surgery, <input type="checkbox"/> one year after surgery, <input type="checkbox"/> two years or more after surgery, |
|                                                                                                                                                                         | Examination method: <input type="checkbox"/> ultrasound, <input type="checkbox"/> CTA, <input type="checkbox"/> MRI, <input type="checkbox"/> DSA                                                                                                                                                      |
|                                                                                                                                                                         | Postoperative restenosis: <input type="radio"/> No <input type="radio"/> Yes                                                                                                                                                                                                                           |
| Another intervention: <input type="radio"/> No. The treatment method: <input type="radio"/> OCEA <input type="radio"/> CAS <input type="radio"/> Conservative treatment |                                                                                                                                                                                                                                                                                                        |

|                                                                                                                                                                 |                                                                                                                                                                                                                                                                                                                                                                                                                                                                                                                                                                                                                                                                                                                                             |
|-----------------------------------------------------------------------------------------------------------------------------------------------------------------|---------------------------------------------------------------------------------------------------------------------------------------------------------------------------------------------------------------------------------------------------------------------------------------------------------------------------------------------------------------------------------------------------------------------------------------------------------------------------------------------------------------------------------------------------------------------------------------------------------------------------------------------------------------------------------------------------------------------------------------------|
| <b>Endometriectomy (CEA)</b>                                                                                                                                    | <input type="radio"/> no <input type="radio"/> yes <input type="radio"/> left <input type="radio"/> right <input type="radio"/> bilateral<br>Operation time(date):_____ Name of institution performing CAS:_____                                                                                                                                                                                                                                                                                                                                                                                                                                                                                                                            |
|                                                                                                                                                                 | <b>Postoperative review:</b> <input type="radio"/> no <input type="radio"/> yes, <b>Time of review:</b> <input type="checkbox"/> 3 months after surgery, <input type="checkbox"/> 6 months after surgery, <input type="checkbox"/> one year after surgery, <input type="checkbox"/> two years or more after surgery,<br><b>Examination method:</b> <input type="checkbox"/> ultrasound, <input type="checkbox"/> CTA, <input type="checkbox"/> MRI, <input type="checkbox"/> DSA<br>Postoperative restenosis: <input type="radio"/> No <input type="radio"/> Yes<br>Another intervention: <input type="radio"/> No. The treatment method: <input type="radio"/> OCEA <input type="radio"/> CAS <input type="radio"/> Conservative treatment |
| <b>Intracranial and extracranial vessel bypass graft</b>                                                                                                        | <input type="radio"/> no <input type="radio"/> yes , The operation time(date) : _____                                                                                                                                                                                                                                                                                                                                                                                                                                                                                                                                                                                                                                                       |
| <b>10.2 Coronary arteries</b>                                                                                                                                   |                                                                                                                                                                                                                                                                                                                                                                                                                                                                                                                                                                                                                                                                                                                                             |
| <b>percutaneous coronary intervention ( PCI )</b>                                                                                                               | <input type="radio"/> no <input type="radio"/> yes , The operation time(date) : _____                                                                                                                                                                                                                                                                                                                                                                                                                                                                                                                                                                                                                                                       |
| <b>coronary artery bypass grafting(CABG)</b>                                                                                                                    | <input type="radio"/> no <input type="radio"/> yes , The operation time(date) : _____                                                                                                                                                                                                                                                                                                                                                                                                                                                                                                                                                                                                                                                       |
| <b>10.3 Surgical treatment of hemorrhagic stroke</b>                                                                                                            |                                                                                                                                                                                                                                                                                                                                                                                                                                                                                                                                                                                                                                                                                                                                             |
| Have you ever received surgical treatment for hemorrhagic stroke: _____ <input type="radio"/> No <input type="radio"/> Yes, The time of treatment (date): _____ |                                                                                                                                                                                                                                                                                                                                                                                                                                                                                                                                                                                                                                                                                                                                             |

The national major public health service project -- the screening and intervention project for the high-risk population of stroke

# Risk factors for cardiovascular and cerebrovascular diseases in 2019

## (Follow-up table of community and township population)

(For community, township, high-risk stroke population at 6 months, 12 months of follow-up and 12 months of middle-risk population follow-up)

Informed consent: I have read the informed consent and volunteered to participate in this screening and intervention project. I agree to use the data for the management of the national health administration

Signature: \_\_\_\_\_

|                                       |                                                        |
|---------------------------------------|--------------------------------------------------------|
| Name of screening institution : _____ | Screening date : day : _____ month: _____ year : _____ |
| Follow-up personnel _____             | Contact number: _____                                  |

### I. BASIC INFORMATION

| 1.1 Demographic information                                                                                                                                                                                                                                                                                                                                                                                                         |                  |
|-------------------------------------------------------------------------------------------------------------------------------------------------------------------------------------------------------------------------------------------------------------------------------------------------------------------------------------------------------------------------------------------------------------------------------------|------------------|
| Name : _____                                                                                                                                                                                                                                                                                                                                                                                                                        | ID number: _____ |
| Follow-up rounds (distance from filing time) : <input type="radio"/> 6 month <input type="radio"/> 12 month                                                                                                                                                                                                                                                                                                                         |                  |
| 1.2 Status of this survey                                                                                                                                                                                                                                                                                                                                                                                                           |                  |
| Method of investigation : <input type="radio"/> face to face<br><input type="radio"/> phone ( <b>Medium-risk group and high-risk group were followed up for 6 months</b> )                                                                                                                                                                                                                                                          |                  |
| Is this survey conducted by the respondents themselves? <input type="radio"/> yes<br><input type="radio"/> no , <b>the relationship between the informer and the respondent:</b> Parents, Spouses, Children                                                                                                                                                                                                                         |                  |
| Lost to visit: <input type="radio"/> No Brothers and sisters, Others:<br>Yes, <b>the reason for the loss of visit:</b> Lost contact <u>Refused</u> to participate in the investigation Other: _____                                                                                                                                                                                                                                 |                  |
| Dead or not : <input type="radio"/> no<br><input type="radio"/> yes, death time , Date : _____ Time: _____                                                                                                                                                                                                                                                                                                                          |                  |
| Cause of death: <input type="radio"/> Stroke ( <input type="radio"/> Hemorrhagic Stroke <input type="radio"/> Ischemic Stroke <input type="radio"/> Unknown )<br><input type="radio"/> coronary heart disease<br><input type="radio"/> malignant tumor<br><input type="radio"/> disease of respiratory system<br><input type="radio"/> damage and poisoning<br><input type="radio"/> others: _____<br><input type="radio"/> unknown |                  |

### 2. Life style during follow-up

|                                                                                                                                                                                                                                                                                                                                                                                                                                                                                                                                                                                                                                                                                                                                                                                                                                                                                                                                                                                                                                                                                                                                                                                                                           |
|---------------------------------------------------------------------------------------------------------------------------------------------------------------------------------------------------------------------------------------------------------------------------------------------------------------------------------------------------------------------------------------------------------------------------------------------------------------------------------------------------------------------------------------------------------------------------------------------------------------------------------------------------------------------------------------------------------------------------------------------------------------------------------------------------------------------------------------------------------------------------------------------------------------------------------------------------------------------------------------------------------------------------------------------------------------------------------------------------------------------------------------------------------------------------------------------------------------------------|
| <p><b>Sports habits</b> : <input type="radio"/> Regular exercise (moderate intensity exercise equivalent to brisk walking, and 3 times per week, each time 30 minutes, including moderate and heavy manual labor) <input type="radio"/> Lack of physical activity (those who do not meet the above criteria for regular exercise)</p> <p><b>Smoking</b>: <input type="radio"/> No <input type="radio"/> Yes</p> <p><b>Drinking</b>: <input type="radio"/> non-drinking <input type="radio"/> small amount drinking <input type="radio"/> regular heavy drinking (Liquor 3 times/week, 100ml each time)</p> <p><b>Taste</b>: <input type="radio"/> salty <input type="radio"/> Weak salty <input type="radio"/> moderate <b>Balance portion of vegetables and meat</b> : <input type="radio"/> Partial meat diet <input type="radio"/> Partial vegetarian diet <input type="radio"/> equilibrium Eat vegetables (<b>eat 300g vegetables a day</b>) : <input type="radio"/> 5 days/week <input type="radio"/> 3-4 days/week <input type="radio"/> 2 days/week</p> <p>Eat fruit (<b>eat 200g fruits a day</b>) : <input type="radio"/> 5 days/week <input type="radio"/> 3-4 days/week <input type="radio"/> 2 days/week</p> |
|---------------------------------------------------------------------------------------------------------------------------------------------------------------------------------------------------------------------------------------------------------------------------------------------------------------------------------------------------------------------------------------------------------------------------------------------------------------------------------------------------------------------------------------------------------------------------------------------------------------------------------------------------------------------------------------------------------------------------------------------------------------------------------------------------------------------------------------------------------------------------------------------------------------------------------------------------------------------------------------------------------------------------------------------------------------------------------------------------------------------------------------------------------------------------------------------------------------------------|

### 3.Main medical history and control during follow-up

|                                                                                                                                                                                                                                                                                                                                                                                                                                                                                                                                                                                                                                                                                                                                                                                                                                                                                                                                                                                                                                                                                                                                                                                                                                                                                                                                                                      |       |
|----------------------------------------------------------------------------------------------------------------------------------------------------------------------------------------------------------------------------------------------------------------------------------------------------------------------------------------------------------------------------------------------------------------------------------------------------------------------------------------------------------------------------------------------------------------------------------------------------------------------------------------------------------------------------------------------------------------------------------------------------------------------------------------------------------------------------------------------------------------------------------------------------------------------------------------------------------------------------------------------------------------------------------------------------------------------------------------------------------------------------------------------------------------------------------------------------------------------------------------------------------------------------------------------------------------------------------------------------------------------|-------|
| <b>3.1 Cerebrovascular disease</b>                                                                                                                                                                                                                                                                                                                                                                                                                                                                                                                                                                                                                                                                                                                                                                                                                                                                                                                                                                                                                                                                                                                                                                                                                                                                                                                                   |       |
| <p><b>There were no new cerebrovascular disease events during the follow-up:</b>    <input type="radio"/> no   <input type="radio"/> yes : How many episodes : _____times</p> <p>Time of first symptoms follow-up _____</p> <p><b>Hospital Level :</b> <input type="radio"/> Provincial hospital <input type="radio"/> Prefecture-level hospital <input type="radio"/> County-level hospitals <input type="radio"/> Community or township health hospitals</p> <p style="padding-left: 40px;">Main diagnosis : <input type="radio"/> infarction <input type="radio"/> hemorrhage <input type="radio"/> SAH <input type="radio"/> TIA</p> <p style="padding-left: 40px;">Whether to receive rehabilitation treatment during hospitalization : <input type="radio"/> no <input type="radio"/> yes</p> <p style="padding-left: 40px;">Whether to receive rehabilitation treatment after hospitalization : <input type="radio"/> no <input type="radio"/> yes</p> <p>(Note: The interval between two attacks should be more than 28 days. If there are two or more attacks, please record them separately.)</p>                                                                                                                                                                                                                                                          |       |
| <b>MRS score: ( Cerebrovascular disease patients )</b>                                                                                                                                                                                                                                                                                                                                                                                                                                                                                                                                                                                                                                                                                                                                                                                                                                                                                                                                                                                                                                                                                                                                                                                                                                                                                                               |       |
| Evaluation of time : day___month ___year___ The evaluator : _____                                                                                                                                                                                                                                                                                                                                                                                                                                                                                                                                                                                                                                                                                                                                                                                                                                                                                                                                                                                                                                                                                                                                                                                                                                                                                                    |       |
| Options (single option)                                                                                                                                                                                                                                                                                                                                                                                                                                                                                                                                                                                                                                                                                                                                                                                                                                                                                                                                                                                                                                                                                                                                                                                                                                                                                                                                              | Score |
| <input type="radio"/> No symptoms at all                                                                                                                                                                                                                                                                                                                                                                                                                                                                                                                                                                                                                                                                                                                                                                                                                                                                                                                                                                                                                                                                                                                                                                                                                                                                                                                             | 0     |
| <input type="radio"/> Despite symptoms, she has no significant dysfunction and is able to complete all routine tasks and daily life                                                                                                                                                                                                                                                                                                                                                                                                                                                                                                                                                                                                                                                                                                                                                                                                                                                                                                                                                                                                                                                                                                                                                                                                                                  | 1     |
| <input type="radio"/> Slightly disabled, unable to complete all pre-illness activities, but able to take care of daily life without assistance                                                                                                                                                                                                                                                                                                                                                                                                                                                                                                                                                                                                                                                                                                                                                                                                                                                                                                                                                                                                                                                                                                                                                                                                                       | 2     |
| <input type="radio"/> Moderately disabled, with partial assistance, but able to walk independently                                                                                                                                                                                                                                                                                                                                                                                                                                                                                                                                                                                                                                                                                                                                                                                                                                                                                                                                                                                                                                                                                                                                                                                                                                                                   | 3     |
| <input type="radio"/> Severe disability, unable to walk independently, unable to meet their daily needs without other people's help                                                                                                                                                                                                                                                                                                                                                                                                                                                                                                                                                                                                                                                                                                                                                                                                                                                                                                                                                                                                                                                                                                                                                                                                                                  | 4     |
| <input type="radio"/> Severe disability, persistent bedridden, incontinence, continuous care and attention, and complete dependence on other people                                                                                                                                                                                                                                                                                                                                                                                                                                                                                                                                                                                                                                                                                                                                                                                                                                                                                                                                                                                                                                                                                                                                                                                                                  | 5     |
| <b>4.2 History of the heart</b>                                                                                                                                                                                                                                                                                                                                                                                                                                                                                                                                                                                                                                                                                                                                                                                                                                                                                                                                                                                                                                                                                                                                                                                                                                                                                                                                      |       |
| <p><b>Heart history :</b> <input type="radio"/> no</p> <p style="padding-left: 40px;"><input type="radio"/> yes , Time of first diagnosis(date) : _____</p> <p style="padding-left: 40px;">Type of heart disease : coronary heart diseases( angina, myocardial, asymptomatic coronary stenosis)</p> <p style="padding-left: 80px;">Atrial fibrillation ( <input type="radio"/>Paroxysmal , <input type="radio"/>Persistent <input type="radio"/> Unknown )</p> <p style="padding-left: 80px;">Valvular heart disease</p> <p style="padding-left: 80px;">Others:<br/>unknown</p> <p><b>Hospital Level :</b> <input type="radio"/> Provincial hospital <input type="radio"/> Prefecture-level hospital <input type="radio"/> County-level hospitals<br/><input type="radio"/> Community or township</p> <p>If you have atrial fibrillation (including previous and newly discovered patients with atrial fibrillation during the current follow-up) :</p> <p style="padding-left: 40px;"><b>Whether or not to take antithrombotic drugs :</b> <input type="radio"/> no <input type="radio"/> yes</p> <p style="padding-left: 40px;"><input type="radio"/> yes , <b>Drug varieties :</b> warfarin New anticoagulant aspirin clopidogrel others</p> <p style="padding-left: 40px;"><b>Drug usage :</b> <input type="radio"/> regular <input type="radio"/> irregular</p> |       |
| <b>3.3 Hypertension</b>                                                                                                                                                                                                                                                                                                                                                                                                                                                                                                                                                                                                                                                                                                                                                                                                                                                                                                                                                                                                                                                                                                                                                                                                                                                                                                                                              |       |
| <p>New hypertension was found during the follow-up:    No    Yes , Time of diagnosis(date):_____</p> <p>If there is hypertension (including previous hypertension and newly discovered hypertension during the current follow-up period),</p> <p style="padding-left: 40px;"><b>Whether to take antihypertensive drugs</b></p> <p style="padding-left: 40px;">Type of drug use : <input type="checkbox"/> diuretics <input type="checkbox"/> calcium <input type="checkbox"/> antagonist    -blocker <input type="checkbox"/>    -blocker <input type="checkbox"/> ,    -blockers, <input type="checkbox"/> ACEI <input type="checkbox"/> ARB <input type="checkbox"/> others</p> <p style="padding-left: 40px;">Drug use : <input type="radio"/> Regularity <input type="radio"/> Irregularity</p> <p style="padding-left: 40px;">Blood pressure control: <input type="radio"/> Standard <input type="radio"/> Not standard    <input type="radio"/> not clear</p>                                                                                                                                                                                                                                                                                                                                                                                                  |       |
| <b>3.4 Abnormal blood lipid</b>                                                                                                                                                                                                                                                                                                                                                                                                                                                                                                                                                                                                                                                                                                                                                                                                                                                                                                                                                                                                                                                                                                                                                                                                                                                                                                                                      |       |

Whether new dyslipidemia was found during the follow-up period :  no  
 yes , Time of diagnosis(date):\_\_\_\_\_

Types of dyslipidemia: high cholesterol high triglyceride high LDL-C low HDL-C unknown

If there is dyslipidemia (including patients with previous dyslipidemia and patients with new dyslipidemia found during the current follow-up),  
 Whether to take lipid-regulating drugs :  no;  yes : Statins Beta Others

### 3.5 Diabetes

Whether there is newly found diabetes during the follow-up: No Yes,  
 the time of diagnosis (date): \_\_\_\_\_ If the patients with diabetes (including the previous and the newly found diabetes during the follow-up).

Whether to use hypoglycemic agents:  no  
 yes : Take hypoglycemic drugs insulin others

Blood glucose control:  Basically up to standard  Not clear

## 4. Surgical or interventional treatment of vascular lesions during the follow-up period

### 4.1 The carotid artery

|                                                   |                                                                                                                                                                         |
|---------------------------------------------------|-------------------------------------------------------------------------------------------------------------------------------------------------------------------------|
| Carotid artery stenting ( CAS )                   | <input type="radio"/> no <input type="radio"/> yes , <input type="radio"/> left <input type="radio"/> right <input type="radio"/> Bilateral operation time(date): _____ |
| Endometriectomy (CEA)                             | <input type="radio"/> no <input type="radio"/> yes , <input type="radio"/> left <input type="radio"/> right <input type="radio"/> Bilateral operation time(date): _____ |
| Intracranial and extracranial vessel bypass graft | <input type="radio"/> no <input type="radio"/> yes , operation time(date): _____                                                                                        |

### 4.2 Coronary arteries

|                                            |                                                                                  |
|--------------------------------------------|----------------------------------------------------------------------------------|
| percutaneous coronary intervention ( PCI ) | <input type="radio"/> no <input type="radio"/> yes , operation time(date): _____ |
| coronary artery bypass grafting(CABG)      | <input type="radio"/> no <input type="radio"/> yes , operation time(date): _____ |

### 4.3 Surgical treatment of hemorrhagic stroke

Have you ever received surgical intervention for hemorrhagic stroke:  No  Yes, Treatment: \_\_\_\_\_ time of therapy(date): \_\_\_\_\_

## 5. Physical examination

(must be done in the 12-month follow-up of high-risk groups)

### 5.1 General signs

Inspection time: month: \_\_\_\_\_; day: \_\_\_\_\_ year: \_\_\_\_\_  
 Height: \_\_\_\_\_ cm Weight: \_\_\_\_\_ kg BMI (automatically generated by the system) : \_\_\_\_\_ (kg/m<sup>2</sup>) Waist circumference: \_\_\_\_\_

### 5.2 Blood pressure ( on the same side, two times )

Time of measurement: month : \_\_\_\_\_ day: \_\_\_\_\_ year: \_\_\_\_\_

First, systolic blood pressure SBP: \_\_\_\_\_ mmhg Diastolic pressure DBP: \_\_\_\_\_ mmhg pulse: \_\_\_\_\_ times/min  
 secondly, systolic blood pressure SBP: \_\_\_\_\_ mmhg Diastolic pressure DBP: \_\_\_\_\_ mmhg pulse: \_\_\_\_\_ times/min

### 5.3 Cardiac auscultation

Inspection time: month: \_\_\_\_\_; day: \_\_\_\_\_ year: \_\_\_\_\_ Heart murmur :  none  have a heart rhythm :  in order  out of order



## 6. Laboratory examination

( must be done in the 12-month follow-up of high-risk groups )

### 6.1 Blood glucose

Inspection time: month:\_\_\_\_;day:\_\_\_\_ year\_\_\_\_ Fasting blood glucose: \_\_\_\_\_ mmol/L

### 6.2 Blood lipids

Inspection time: month:\_\_\_\_;day:\_\_\_\_ year\_\_\_\_

Triglyceride: \_\_\_\_\_ mmol/L, Cholesterol: \_\_\_\_\_ mmol/L

Low density lipoprotein cholesterol: \_\_\_\_\_ mmol/L High density lipoprotein cholesterol : \_\_\_\_\_ mmol/L

Table S3: Information on the cities participating in the screening project

| Year  | Cities | Hospitals | Village or community | Included peoples‡ | Screened peoples | Enrollment rate (%) |
|-------|--------|-----------|----------------------|-------------------|------------------|---------------------|
| 2013  | 162    | 181       | 315                  | 723,571           | 1,070,590        | 67.8                |
| 2014  | 164    | 184       | 342                  | 670,603           | 1,026,016        | 65.4                |
| 2015  | 180    | 209       | 376                  | 699,459           | 1,155,872        | 60.5                |
| 2016  | 178    | 206       | 366                  | 513,147           | 802,255          | 64.0                |
| 2017  | 189    | 223       | 416                  | 533,243           | 906,921          | 58.8                |
| 2018  | 186    | 227       | 401                  | 550,975           | 865,367          | 63.7                |
| 2019  | 183    | 220       | 405                  | 539,418           | 845,463          | 63.8                |
| Total | 223    | 260       | 1161                 | 4,229,616         | 6,672,484        | 63.4                |

‡The data cleaning process consists of two parts: screening points and participating individuals.

(1) Screening points that meet the following criteria will be eliminated as a whole:

- ① The sample size is less than 400;
- ② Prevalence of stroke is 0;
- ③ The male to female ratio is greater than 1.5 or less than 0.4.

(2) Participating individuals that meet the following criteria will be eliminated:

- ① Lack of informed consent;
- ② Lack of main information, including gender, age, body mass index, blood pressure and risk factors (stroke, hypertension, diabetes, hyperlipidemia, smoking, atrial fibrillation, lack of exercise, family history of stroke and transient Ischemic Attack);
- ③ Lack of laboratory test results;
- ④ The reported data is obviously abnormal: age less than 40 years old or greater than 110; height less than 100cm or greater than 220cm; weight less than 40kg or greater than 150kg; systolic blood pressure greater than 250 mmHg or less than 90 mmHg; diastolic blood pressure greater than 200 mmHg or less 60 mmHg; laboratory test results are 0;

Table S4: Information on the cities participating in the screening project

| Province/Municipality | City               | 2013   | 2014 | 2015 | 2016 | 2017 | 2018 | 2019 |
|-----------------------|--------------------|--------|------|------|------|------|------|------|
| Beijing               | Changping district | v      | v    | v    |      | v    |      |      |
|                       | Chaoyang district  | v      | v    | v    | v    | v    | v    |      |
|                       | Dongcheng district | v      | v    | v    | v    | v    | v    |      |
|                       | Fangshan district  | v      | v    |      |      |      |      |      |
|                       | Fengtai district   | v      | v    | v    | v    | v    | v    | v    |
|                       | Haidian district,  | v      | v    | v    | v    | v    | v    | v    |
|                       | Huairou district   | v      | v    |      |      |      |      |      |
|                       | Tongzhou district  |        | v    |      |      |      |      |      |
|                       | Xicheng district   | v      | v    | v    | v    | v    |      |      |
| Tianjin               | Beichen district   | v      | v    | v    | v    | v    |      | v    |
|                       | Dongli district    |        | v    |      | v    |      |      |      |
|                       | Heping district    |        | v    |      | v    |      | v    |      |
|                       | Hebei district     | v      | v    |      | v    |      | v    |      |
|                       | Hexi district      |        |      |      |      | v    |      | v    |
|                       | Hongqiao district  | v      | v    |      | v    |      |      |      |
|                       | Jinnan district    |        | v    |      | v    |      | v    |      |
|                       | Binhai New Area    |        |      | v    | v    | v    | v    | v    |
|                       | Nankai district    | v      | v    | v    | v    | v    | v    | v    |
|                       | Xiqing district    | v      |      | v    |      | v    |      | v    |
| Hebei                 | Baoding city       | v      | v    | v    | v    | v    | v    | v    |
|                       | Cangzhou city      | v      |      |      | v    | v    | v    | v    |
|                       | Chengde city       |        | v    | v    | v    | v    | v    | v    |
|                       | Handan city        | v      | v    | v    | v    | v    | v    | v    |
|                       | Hengshui city      | v      | v    | v    | v    | v    | v    | v    |
|                       | Qinhuangdao        |        |      |      |      | v    | v    | v    |
|                       | Shijiazhuang city  | v      | v    | v    | v    | v    | v    | v    |
|                       | Tangshan           | v      |      | v    | v    | v    | v    |      |
|                       | Xingtai            |        |      |      |      | v    | v    | v    |
|                       | Shanxi             | Datong | v    | v    | v    | v    | v    | v    |
| Jinzhong city         |                    | v      |      |      |      | v    | v    | v    |
| Linfen                |                    |        |      | v    |      |      | v    | v    |
| Luliang city          |                    | v      | v    | v    | v    | v    | v    | v    |
| Taiyuan city          |                    | v      | v    | v    | v    | v    | v    | v    |
| Yangquan city         |                    | v      | v    | v    | v    | v    | v    | v    |
| Yuncheng              |                    | v      | v    | v    | v    | v    | v    | v    |
| Changzhi city         |                    | v      | v    | v    | v    | v    | v    | v    |
| Inner Mongolia        | Baotou city        | v      | v    | v    | v    | v    | v    | v    |
|                       | Chifeng city       | v      | v    | v    | v    | v    | v    | v    |
|                       | Ordos city         | v      | v    | v    | v    | v    | v    | v    |
|                       | Hohhot             |        | v    | v    | v    | v    | v    | v    |
|                       | Hulun buir         | v      | v    | v    | v    | v    | v    | v    |
|                       | Autonomous region  |        |      | v    |      |      |      |      |
|                       | Tongliao           | v      |      | v    |      | v    | v    | v    |
|                       | Xingan league      | v      |      |      |      |      |      |      |
| Liaoning              | Benxi              |        |      |      |      |      |      | v    |
|                       | Chaoyang           | v      | v    | v    | v    | v    | v    |      |
|                       | Dalian             | v      | v    | v    | v    | v    | v    | v    |
|                       | Dandong            |        |      |      | v    | v    | v    | v    |
|                       | Huludao            | v      |      | v    | v    | v    | v    |      |
|                       | Jinzhou            | v      | v    | v    | v    | v    | v    | v    |
|                       | Liaoyang           |        | v    |      | v    | v    | v    | v    |

|              |                 |   |   |   |   |   |   |   |
|--------------|-----------------|---|---|---|---|---|---|---|
|              | Shenyang        | v | v | v | v | v | v | v |
|              | Yingkou         | v | v | v | v | v | v | v |
| Jilin        | Jilin           | v | v | v | v | v | v | v |
|              | Siping          | v | v | v | v | v | v | v |
|              | Songyuan        | v | v | v | v | v | v | v |
|              | Tonghua         | v | v | v | v | v | v | v |
|              | Yanbian         |   | v | v | v | v | v | v |
|              | Changchun       | v | v | v | v | v | v | v |
|              |                 |   |   |   |   |   |   |   |
| Heilongjiang | Daqin           | v | v | v | v | v | v | v |
|              | Harbin          | v | v | v | v | v | v | v |
|              | Jiamusi         | v | v | v | v | v | v | v |
|              | Mudanjiang      | v | v | v | v | v | v | v |
|              | Qiqihaer        | v | v | v | v | v | v | v |
|              | Suihua          |   |   |   |   |   | v |   |
| Shanghai     | Pudong new area | v | v | v | v | v | v | v |
|              | Yangpu district |   |   |   |   | v | v |   |
| Jiangsu      | Changzhou       | v | v | v | v | v | v | v |
|              | Lianyungang     | v | v |   | v | v | v | v |
|              | Nanjing         | v | v | v | v | v | v | v |
|              | Nantong         | v | v | v | v | v | v | v |
|              | Suzhou          | v | v | v | v | v | v | v |
|              | Wuxi            | v | v | v | v | v | v | v |
|              | Xuzhou          | v | v | v | v | v | v | v |
|              | Yancheng        | v | v | v | v | v | v | v |
|              | Yangzhou        | v | v | v | v | v | v | v |
| Zhejiang     | Hangzhou        | v | v | v | v | v | v | v |
|              | Huzhou          | v | v | v | v | v | v | v |
|              | Jiaxing         |   |   |   |   |   | v |   |
|              | Lishui city     | v |   | v | v | v | v | v |
|              | Shaoxing        |   |   | v | v | v | v | v |
|              | Taizhou         | v | v | v | v | v | v |   |
|              | Wenzhou         | v | v | v | v |   | v | v |
| Anhui        | Anqing          |   | v | v |   | v | v | v |
|              | Fuyang          |   | v | v | v | v | v | v |
|              | Heifei          | v | v | v | v | v | v | v |
|              | Huainan         |   | v | v | v | v |   | v |
|              | Lu'an           | v |   | v |   | v |   | v |
|              | Maanshan        | v | v | v | v | v | v | v |
|              | Tongling        |   |   | v | v | v | v | v |
|              | Wuhu            | v | v | v | v | v | v | v |
|              | Suzhou          | v | v | v | v | v | v | v |
|              | Xuancheng       |   | v |   | v |   | v |   |
| Fujian       | Fuzhou          | v | v | v | v | v | v | v |
|              | Longyan         |   | v | v | v | v | v |   |
|              | Nanping         |   |   | v | v | v |   |   |
|              | Ningde          | v | v | v | v | v | v | v |
|              | Quanzhou        | v | v | v | v | v | v | v |
|              | Sanming         |   |   | v | v | v |   | v |
|              | Xiamen          | v |   | v | v | v | v | v |
|              | Zhangzhou       |   |   |   | v |   |   |   |
| Jiangxi      | Ganzhou         |   |   | v | v | v | v | v |
|              | Shangrao        | v |   | v | v | v | v | v |
|              | Jiujiang        | v | v | v | v | v | v | v |
|              | Nanchang        | v | v | v | v | v | v | v |

|           |              |           |   |   |   |   |   |   |
|-----------|--------------|-----------|---|---|---|---|---|---|
|           | Pingxiang    | v         | v | v | v | v | v | v |
|           | Xinyu        |           |   | v |   | v | v | v |
| Shandong  | Yichun       | v         | v | v | v | v | v | v |
|           | Binzhou      | v         | v | v | v | v | v | v |
|           | Dezhou       | v         | v | v | v | v | v | v |
|           | Dongying     | v         | v | v | v | v | v | v |
|           | Heze         | v         | v | v | v | v | v | v |
|           | Jinan        | v         | v | v | v | v | v | v |
|           | Jining       | v         | v | v | v | v | v | v |
|           | Liaocheng    | v         | v | v | v | v | v | v |
|           | Linyi        | v         | v | v | v | v | v | v |
|           | Qingdao      | v         | v | v | v | v | v | v |
|           | Tai'an       | v         | v | v | v | v | v | v |
|           | Weihai       | v         | v | v | v | v | v | v |
|           | Weifang      | v         | v | v | v | v | v | v |
|           | Yantai       | v         | v | v | v | v | v | v |
| Henan     | Anyang       | v         | v | v | v | v | v | v |
|           | Hebi city    |           |   | v |   | v | v | v |
|           | Jiaozuo      | v         | v | v | v | v | v | v |
|           | Kaifeng      | v         |   | v |   | v | v | v |
|           | Luoyang      | v         | v | v | v | v | v | v |
|           | Luohe        | v         | v | v | v | v |   | v |
|           | Nanyang      | v         | v | v | v | v | v | v |
|           | pingdingshan |           |   | v |   | v | v | v |
|           | Puyang       |           |   |   |   |   |   | v |
|           | Sanmenxia    |           |   |   |   |   |   | v |
|           | Shangqiu     | v         | v | v | v | v | v | v |
|           | Xinxiang     | v         | v | v | v | v | v | v |
|           | Xinyang      |           |   | v |   | v |   |   |
|           | Xuchang      | v         | v | v | v | v | v | v |
|           | Zhengzhou    | v         | v | v | v | v | v | v |
|           | Zhoukou      |           |   |   |   | v | v | v |
|           | Zhumadian    | v         |   | v | v | v | v |   |
|           | Hubei        | Huanggang | v | v | v | v | v | v |
| Jingmen   |              | v         | v | v | v | v | v | v |
| Jingzhou  |              |           | v |   | v |   |   |   |
| Shiyan    |              | v         | v | v | v | v | v | v |
| Wuhan     |              | v         | v | v | v | v | v | v |
| Xiangyang |              | v         |   | v |   |   | v |   |
| Xiaogan   |              | v         | v | v | v | v | v |   |
| Yichang   |              | v         | v | v | v | v | v | v |
| Hunan     | Changde      |           | v | v | v | v | v | v |
|           | Chenzhou     | v         | v | v | v | v | v | v |
|           | Hengyang     |           | v | v | v | v | v | v |
|           | Huaihua      | v         | v | v |   | v | v | v |
|           | Shaoyang     | v         | v | v | v | v | v | v |
|           | Xiangtan     | v         | v | v | v | v | v | v |
|           | Yiyang       |           | v |   | v |   | v |   |
|           | Yongzhou     |           | v | v | v | v | v | v |
|           | Yueyang      | v         | v | v | v | v | v | v |
|           | Zhangjiajie  |           |   | v |   | v |   | v |
|           | Changsha     | v         | v | v | v | v | v | v |
|           | Zhuzhou      | v         | v | v | v | v | v | v |
| Guangdong | Guangzhou    |           | v |   |   |   |   |   |

|           |                    |        |   |   |   |   |   |   |
|-----------|--------------------|--------|---|---|---|---|---|---|
|           | Huizhou            | v      |   |   |   |   |   |   |
|           | Qingyuan           | v      | v | v | v | v | v | v |
|           | Shaoguan           | v      | v | v | v | v | v | v |
|           | Shenzhen           | v      | v | v |   | v | v | v |
|           | Zhanjiang          |        | v |   | v | v | v | v |
|           | Zhongshan          | v      |   |   |   | v |   |   |
|           | Zhuhai             | v      | v | v | v | v |   | v |
| Gaungxi   | Baise              |        |   | v | v | v | v | v |
|           | Laibin             | v      | v | v | v | v | v | v |
|           | Guilin             | v      | v | v | v | v | v | v |
|           | Liuzhou            |        | v | v | v | v | v | v |
|           | Nanning            | v      |   | v | v | v | v | v |
|           | Qinzhou            | v      |   | v | v | v | v | v |
|           | Wuzhou             |        |   | v | v | v | v | v |
|           | Yulin              | v      | v | v | v | v | v | v |
| Hainan    | Haikou             | v      | v | v | v | v | v | v |
|           | Sanya              |        | v | v | v | v | v | v |
|           | Qionghai           | v      | v | v | v | v | v | v |
| Chongqing | Jiulongpo district |        | v |   | v | v | v | v |
|           | Qijiang            | v      |   | v |   |   |   |   |
|           | Wanzhou district   | v      | v | v | v | v | v | v |
|           | Yubei District     |        |   |   |   |   |   | v |
|           | Yuzhong district   | v      | v | v | v | v | v | v |
| Sichuan   | Chengdu            | v      | v | v | v | v | v | v |
|           | Deyang             | v      | v | v | v | v | v | v |
|           | Leshan             |        |   |   |   |   | v | v |
|           | Luzhou             | v      | v | v | v | v | v | v |
|           | Mianyang           | v      | v | v | v | v | v | v |
|           | Nanchong           | v      | v | v | v | v | v | v |
|           | Suining            | v      | v | v | v | v | v | v |
|           | Yibin              |        |   |   |   |   | v | v |
|           | Zigong             | v      | v | v | v | v | v | v |
|           |                    | Ziyang | v | v | v | v | v | v |
| Guizhou   | Guiyang            | v      | v | v | v | v | v | v |
|           | Liupanshui         | v      |   |   |   |   |   |   |
|           | Zunyi              | v      | v | v | v | v | v | v |
| Yunnan    | Chuxiong           |        |   |   | v |   | v |   |
|           | Dali               | v      | v | v | v | v | v | v |
|           | kunming            | v      | v | v | v | v | v | v |
|           | Lijiang            | v      | v | v | v | v | v | v |
|           | Qujing             | v      | v | v | v | v | v | v |
|           | Yuxi               | v      | v | v | v | v | v | v |
| Tibet     | Lhasa              | v      | v | v | v | v | v | v |
| Shaanxi   | Ankang             | v      | v |   | v |   | v |   |
|           | Baoji              | v      | v | v | v | v | v | v |
|           | Weinan             |        |   | v |   | v |   | v |
|           | Xi 'an             | v      | v | v | v | v | v | v |
|           | Yan 'an            | v      | v | v | v | v | v | v |
|           | Yulin              | v      | v | v | v | v | v | v |
| Gansu     | Baiyin             | v      | v | v | v | v | v | v |
|           | Dingxi             | v      |   |   |   |   |   | v |
|           | Jiuquan            | v      | v | v | v | v | v | v |
|           | Lanzhou            | v      | v | v | v | v | v | v |
|           | Qingyang           | v      |   | v | v | v | v | v |
|           | Tianshui           | v      | v | v | v | v | v | v |

|          |             |   |   |   |   |   |   |   |
|----------|-------------|---|---|---|---|---|---|---|
|          | Wuwei       |   |   |   |   | v | v | v |
| Qinghai  | Haidong     |   |   | v |   |   |   | v |
|          | Haixi       |   | v |   | v | v | v |   |
|          | Xining      | v | v | v | v | v | v | v |
| Ningxia  | Yinchuan    | v | v | v | v | v | v | v |
| Xinjiang | Bayingeleng |   |   | v |   | v |   | v |
|          | Changji     | v | v | v | v | v | v | v |
|          | Kashgar     | v | v | v | v | v | v | v |
|          | Urumqi      | v | v | v | v | v | v | v |
|          | Autonomous  |   |   | v | v | v |   |   |

Table S5: the enrollment rates by province in 2019

| Provinces      | Screened peoples | Included peoples | Enrollment rate (%) |
|----------------|------------------|------------------|---------------------|
| Beijing        | 7013             | 4290             | 61.2                |
| Tianjin        | 15708            | 6842             | 43.6                |
| Hebei          | 43861            | 23871            | 54.4                |
| Shanxi         | 33450            | 16899            | 50.5                |
| Inner Mongolia | 19930            | 10562            | 53.0                |
| Liaoning       | 40988            | 26068            | 63.6                |
| Jilin          | 28406            | 15761            | 55.5                |
| Heilongjiang   | 34013            | 21703            | 63.8                |
| Shanghai       | 8357             | 5387             | 64.5                |
| Jiangsu        | 51145            | 43819            | 85.7                |
| Zhejiang       | 29281            | 21311            | 72.8                |
| Anhui          | 35825            | 18214            | 50.8                |
| fujian         | 22487            | 10142            | 45.1                |
| Jiangxi        | 30898            | 18789            | 60.8                |
| Shandong       | 68104            | 52966            | 77.8                |
| Henan          | 67014            | 44790            | 66.8                |
| Hubei          | 28184            | 17563            | 62.3                |
| Hunan          | 56188            | 29115            | 51.8                |
| Guangdong      | 23712            | 18141            | 76.5                |
| Guangxi        | 24432            | 17517            | 71.7                |
| Hainan         | 6059             | 3793             | 62.6                |
| Chongqing      | 20632            | 13255            | 64.2                |
| Sichuan        | 46452            | 35967            | 77.4                |
| Guizhou        | 22882            | 12426            | 54.3                |
| Yunan          | 16903            | 10625            | 62.9                |
| Tibet          | 2332             | 940              | 40.3                |
| Shaanxi        | 23116            | 17504            | 75.7                |
| Gansu          | 15265            | 8437             | 55.3                |
| Qinghai        | 4701             | 2818             | 59.9                |
| Ningxia        | 7795             | 4513             | 57.9                |
| Xinjiang       | 10328            | 5390             | 52.2                |



## **References**

1. WHO. Global Health Observatory (GHO) data. Prevalence of insufficient physical activity. [http://www.who.int/gho/ncd/risk\\_factors/physical\\_activity/en/](http://www.who.int/gho/ncd/risk_factors/physical_activity/en/) (accessed Oct 10, 2017).
2. Chen C, Lu FC. The guidelines for prevention and control of overweight and obesity in Chinese adults. *Biomed Environ Sci.* 2004;17(suppl):1–36.
3. Chinese guidelines on prevention and treatment of dyslipidemia in adults. *Zhonghua Xin Xue Guan Bing Za Zhi.* 2007; 35:390–419
